# Supplementary material
Source: MDPI journal article supplement (https://www.mdpi.com/2072-4292/14/6/1414)
Supplement: s1 [file s1]

**Supplementary Table S1.** Nomenclature of processing schemes used in the current study. TP: Samples are those that are in the positive class and are correctly classified, TN: Samples that are correctly classified as negative, FP: Samples that are not truly of the positive class but are incorrectly mapped as positive. FN: Samples that are mapped as negative when, they are positive [135].

| Accuracy Measure        | Equation                                                      |
|-------------------------|---------------------------------------------------------------|
| <i>Precision</i>        | $\frac{TP}{TP + FP}$                                          |
| <i>Recall</i>           | $\frac{TP}{TP + FN}$                                          |
| <i>F1-Score</i>         | $\frac{2 \times Precision \times Recall}{Precision + Recall}$ |
| <i>Overall Accuracy</i> | $\frac{Total\ TP}{TP + FP + FN + TN}$                         |
| <i>Error Rate</i>       | $1 - Overall\ Accuracy$                                       |
| <i>Specificity</i>      | $\frac{TN}{TN + FP}$                                          |
